## Insights on clinical outcomes in according to age in patients undergoing Transcatheter Aortic Valve Replacement

M. Munoz-Garcia, E. Munoz-Garcia, A.J. Munoz Garcia, A.J. Dominguez-Franco, J.H. Alonso-Briales, M.F. Jimenez-Navarro, J.M. Hernandez-Garcia, J.J. Gomez-Doblas

University Hospital Virgen de la Victoria, Department of Cardiology, Malaga, Spain

**Funding Acknowledgement:** Type of funding sources: None.

Transcatheter Aortic Valve Replacement (TAVR) is considered the treatment in patients older or at high or intermediate risk. Results from contemporary randomized trials in low-risk patients will likely broaden the indication of TAVR, but the data regarding long-term are limited by older population.

The aim of this study was to evaluate the survival and the factors predicting mortality after TAVR in according to age.

**Methods:** From April 2008 to December 2019, the self-expandable and balloon-expandable prostheses were implanted in 765 patients with symptomatic severe aortic stenosis with deemed high risk on base to age, <80 years and ≥80 years old. The rate of acute complications was defined by the combined endpoint of death, vascular complications, myocardial infarction, major bleeding or stroke.

**Results:** The mean age in patients <80 compared with ≥80 years, was 73.69±6.5 vs. 83.4±2.1 years and the logistic EuroSCORE and STS score were 15.9±11% vs. 18±11%, 4.8±3 vs. 6.3±4,  $p>0.001$ , respectively. In-hospital mortality was 4% vs. 3.4%,  $p=0.404$ , and the rate of acute complications was 19.6 vs. 16.5%,  $p=0.168$ . The late mortality (beyond 30 days) was 36.9 vs. 35.2%,  $p=0.352$ .

When compared in both groups, there were no differences for the presence of threatening bleeding 3.4% vs. 3.2% (HR = 1.028 [IC95% 0.722–1.463],  $p=0.516$ ), myocardial infarction 4% vs. 2.5% (HR = 1.263 [IC95% 0.814–

1.960],  $p=0.167$ ), stroke 8% vs. 9.1% (HR = 1.149 [IC95% 0.686–1.925],  $p=0.347$ ) and acute kidney injury 14.1% vs. 19.1% (HR=0.114 [IC95% 0.969–2.141],  $p=0.071$ ) and there was difference in between groups in hospitalizations for heart failure 14.6% vs. 7.9% (HR = 1.398 [IC95% 1.075–1.817],  $p=0.008$

Survival at 1, 3, and 5 were similar in both groups (88% vs. 89.5%, 73.3 vs. 78.2%, 58.8 vs. 62.6%, log Rank 0.992,  $p=0.319$ ), respectively, after a mean follow-up of 42.3±27 months.

The main predictors of cumulative mortality in young patients were: Charlson index [HR 1.18 (95% CI 1.06–1.30),  $p=0.001$ ], Acute Kidney Injury [HR 2.21 (95% CI 1.42–3.47),  $p=0.001$ ], Left ventricular ejection fraction [HR 1.02 (95% CI 1.009–1.035),  $p=0.001$ ], and protective factor was a higher Karnofsky index [HR 0.98 (95% CI 0.97–0.99)  $p=0.006$ ]. And in older patients were: Frailty [HR 1.67 (95% CI 1.13–2.47),  $p=0.010$ ], COPD [HR 2.09 (95% CI 1.41–2.91),  $p=0.001$ ], Stroke [HR 3.01 (95% CI 1.54–5.89),  $p=0.001$ ] Charlson index [HR 1.14 (95% CI 1.02–1.27),  $p=0.015$ ], Acute Kidney Injury [HR 1.57 (95% CI 1.06–2.32),  $p=0.001$ ].

**Conclusions:** TAVR is associated with low complications rate in young and older patients. Survival during follow-up was similar in both groups, but the predictive factors of mortality differ, with greater impact on the comorbidity in the elderly patients
